# Supplementary material
Source: publisher figshare collection journal article supplement (https://sage.figshare.com/ndownloader/files/34248961)
Supplement: Supplementary file 1 [file 34248961]

## Multi-Bilateral Aid for Disease Control Codebook

**Donor:** Name of donor Country

**DCODE:** Correlates of War identification code for donor country

**DWHOID:** World Health Organization identification code for donor country

**recip:** Name of recipient country

**RCODE:** Correlates of War identification code for recipient country

**RWHOID:** World Health Organization identification code for donor country

**dyadid:** Unique identifier for donor-recipient dyad

**Disease:** Disease identification Code

- 100: polio
- 101: HIV/Aids
- 102: malaria
- 103: tuberculosis
- 104: measles
- 108: trypanosomiasis
- 112: acute respiratory infection
- 115: dengue
- 116: diarrheal diseases
- 120: tetanus
- 131: schistosomiasis
- 135: pertussis

**diseasecommitmentmulti:** Total amount earmarked aid given by bilateral donors through multilateral channels

**diseasecommitmenttotal:** Total amount of aid from bilateral donors

**diseasecommitmentbilat:** Total amount of bilateral aid

**diaid:** Dichotomous measure of whether aid of any kind was given by specified donor to specified recipient. (0=no aid given; 1= aid given)

**multiproportion1:** Proportion of aid from donor to recipient that was given as multi-bilateral aid

**bilatproportion1:** Proportion of aid from donor to recipient that was given as bilateral aid

**Rbodavg:** Recipient burden of disease measured as average disability-adjusted life years

**Dbodavg:** Donor burden of disease measured as average disability adjusted life years

**Gbodavg:** Global burden of disease measured as average disability adjusted life years

**gdpcap:** average GDP/capita of recipient country

**loggdpicap:** Natural log of average GDP/capita of the recipient country

**vaccine:** Dichotomous measure of whether a vaccine exists for the specific disease. (1=vaccine available; 0=no vaccine available) Note: at time of writing, malaria vaccine was not available

**vector:** Dichotomous measure of vector-borne illness. (1=vector borne illness; 0=not vector borne)

**mdg:** Dichotomous measure of whether or not the disease was specifically targeted in the Millennium Development Goals (MDG). (1=targeted by MDG; 0=not targeted by MDG)

**hiv:** Dichotomous identifier for HIV/AIDS (1=HIV/AIDS; 0=other disease)

**governance:** Worldwide Governance Indicators of Government Effectiveness scores for recipient

**migration:** Average number of new migrants that move from recipient to donor country from 2005 to 2011 as reported by the Organization for Economic Cooperation and Development.

**logmig:** Natural log of the number of new migrants that move from recipient to donor country from 2005-2011.

**tradetotal:** Average trade between donor and recipient from 2005 to 2011 in billions of constant US dollars (2000) collected from the International Monetary Fund directions of trade dataset.

**logtrade:** Natural log of average trade between donor and recipient from 2005 to 2011.

**costavg:** Estimated costs of averting a single disability-adjusted life year (DALY) for all interventions identified by Laxminarayan and Shahid-Salles (2006) for each disease. Costs were converted to constant US dollars (2000) for each disease.

**rec\_donors:** Number of donors giving any type of aid to the specified recipient for the specified disease.

**global\_donors:** Number of donors giving any type of aid for a specified disease.

**Rboddonors:** Interaction term between **rec\_donors** and **Rbodavg**.

**multidi:** Dichotomous measure of whether or not a recipient received multi-bilateral aid for the specified disease. (1=aid received; 0=no aid received)

**bilatdi:** Dichotomous measure of whether or not a recipient received bilateral aid for the specified disease. (1=aid received; 0=no aid received)
